# Supplementary material for: Phenotypic Mismatches Reveal Escape from Arms-Race Coevolution
Source: PLOS journal article supplement (doi:10.1371/journal.pbio.0060060), 2008-03-06

## A. Mismatched Localities

### Elevated Phenotypes

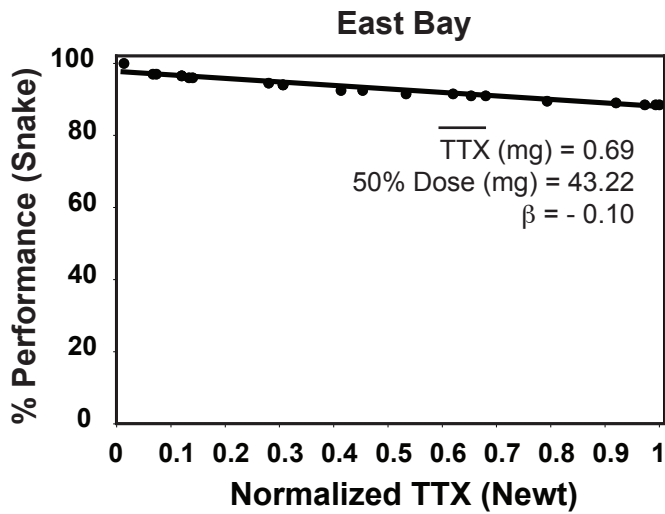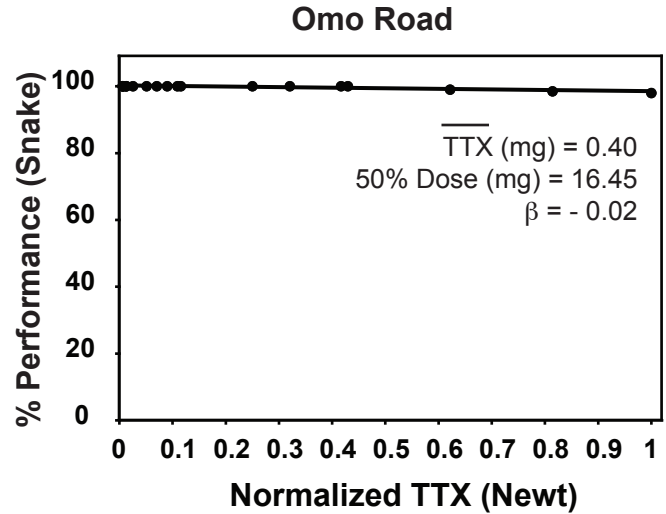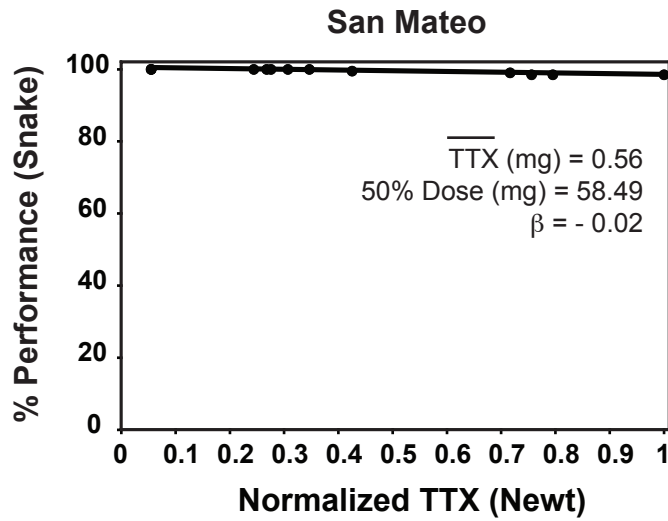

### “Ancestral” Phenotypes

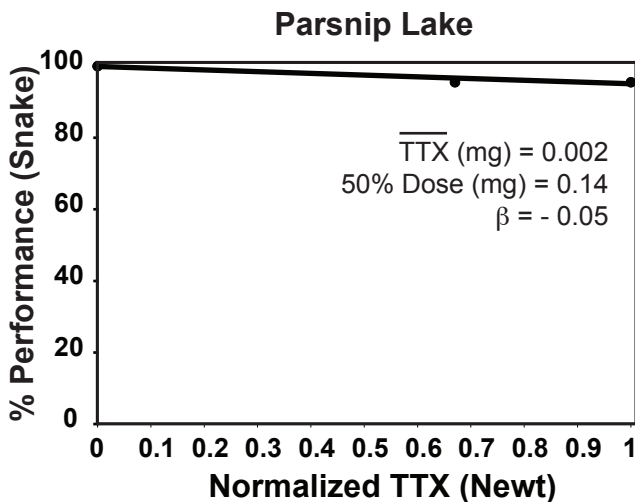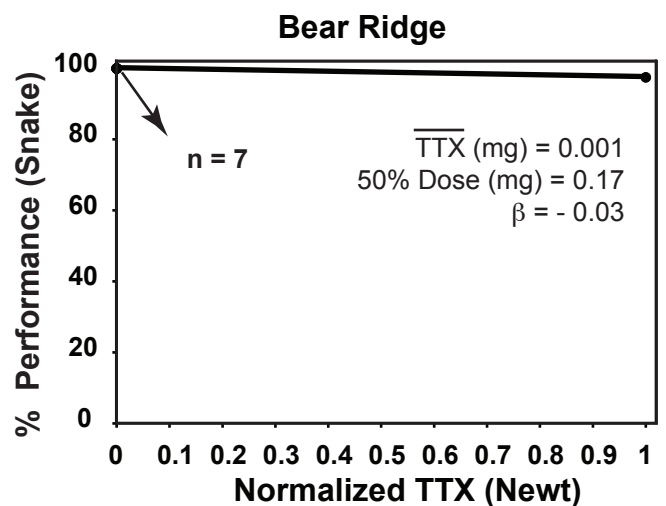

## B. Potentially Matched Localities

### McGribble

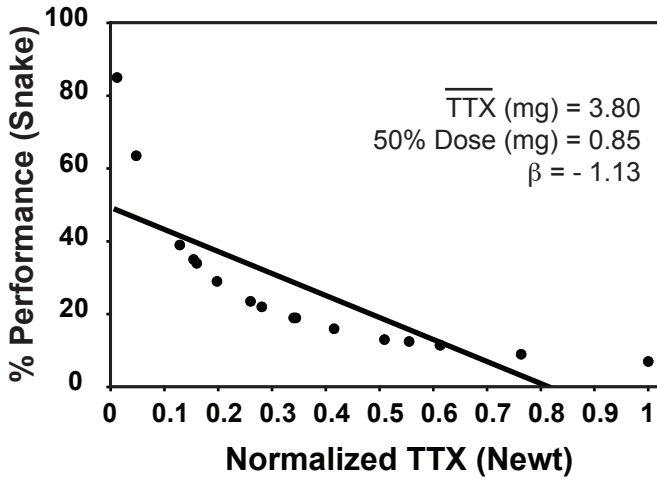

### Willits

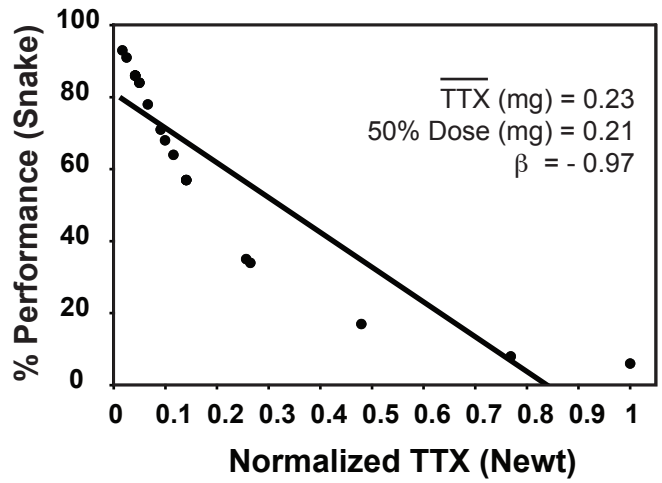

### Vancouver Island

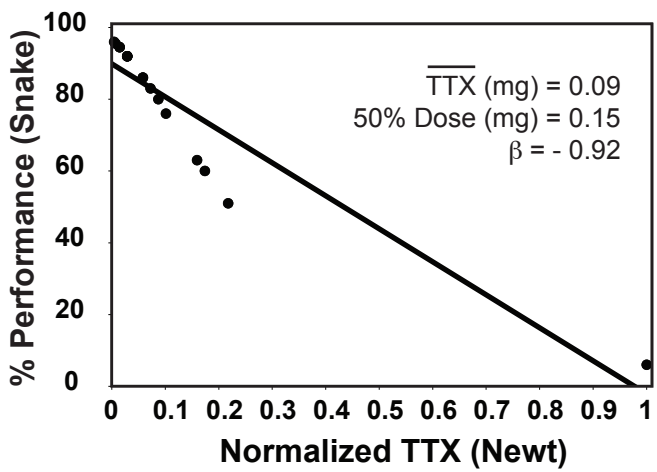

### Warrenton

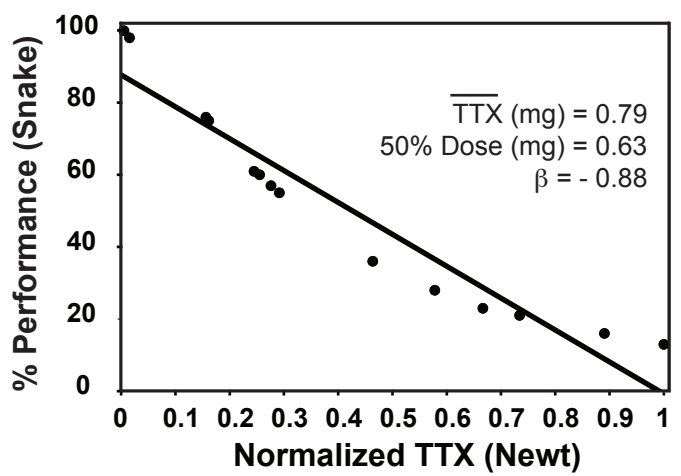

### Chinook

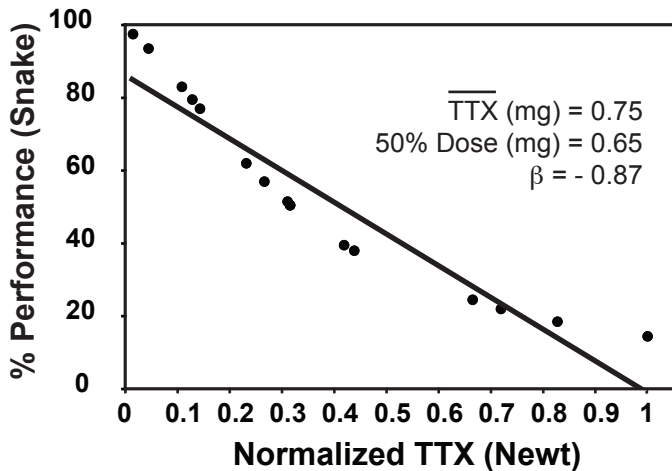

### Hoquiam

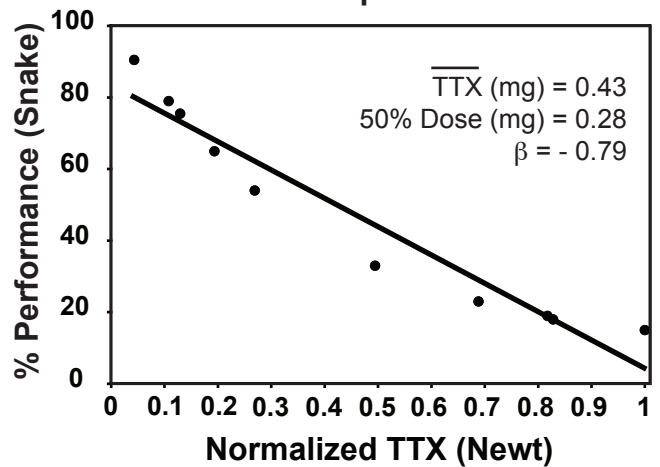

## B. Potentially Matched Localities (cont.)

### San Simeon

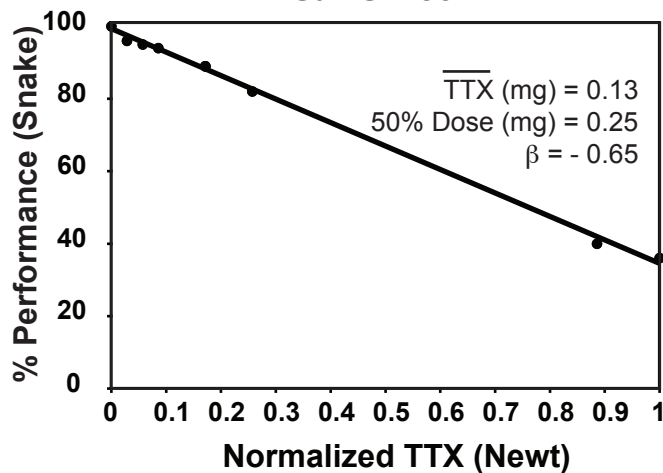

### Wildboy

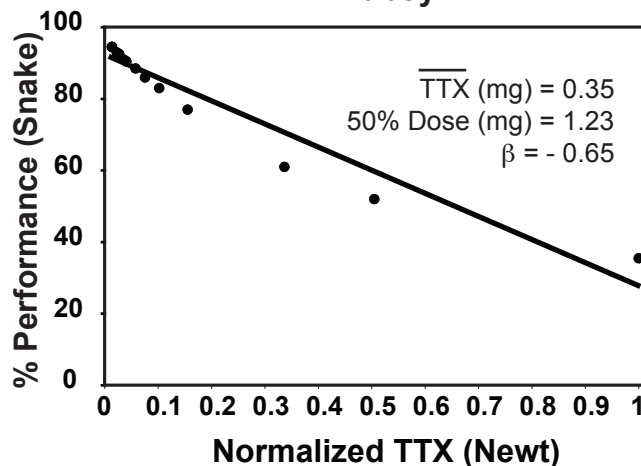

### Benton

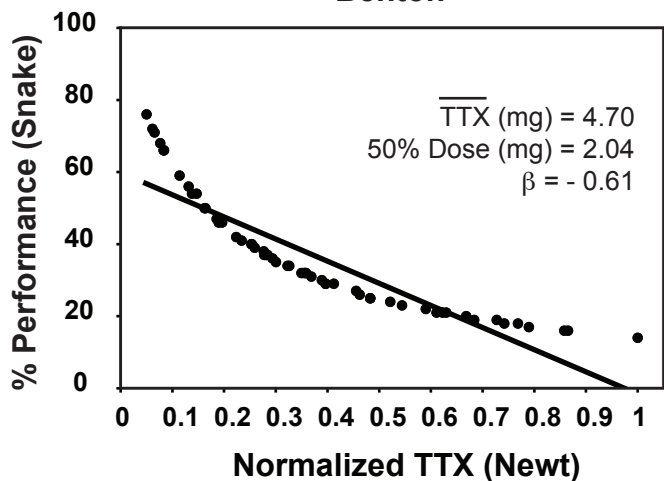

### Gilroy

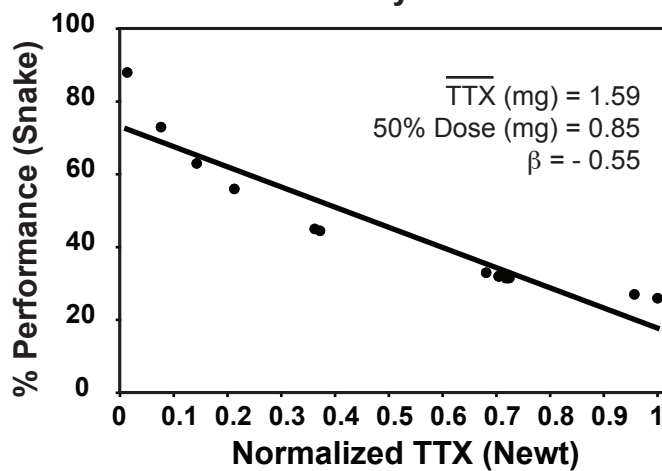

### Tenmile

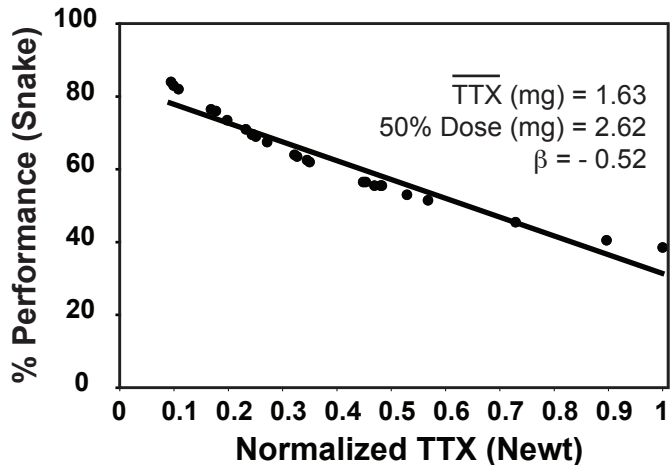

### Clallam

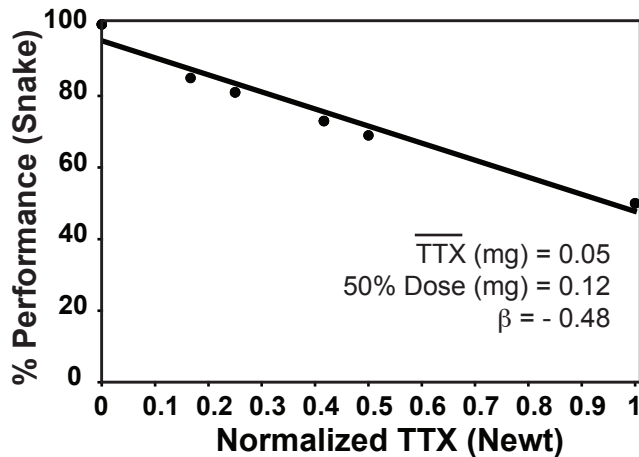

B. Potentially Matched Localities (cont.)

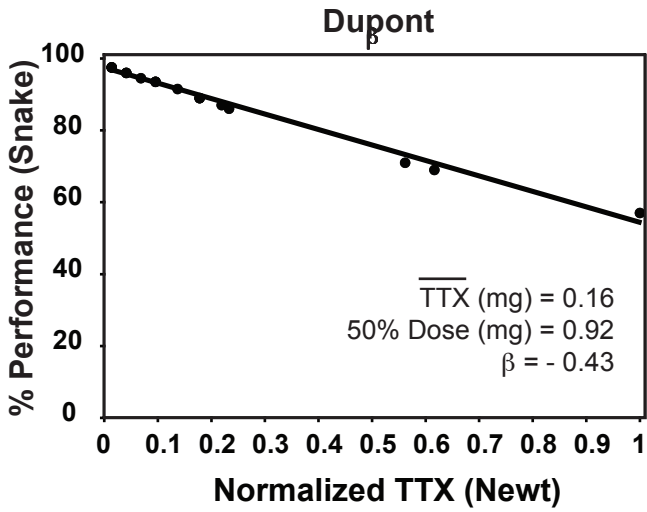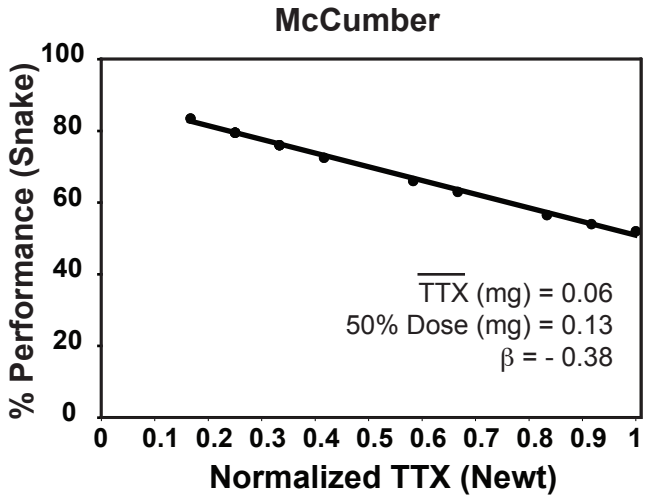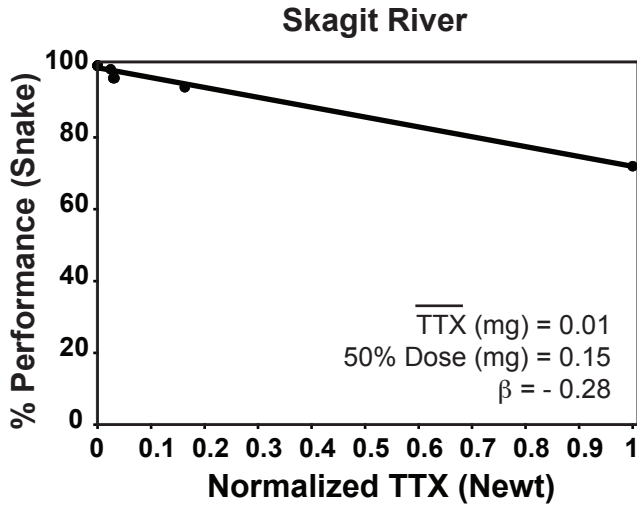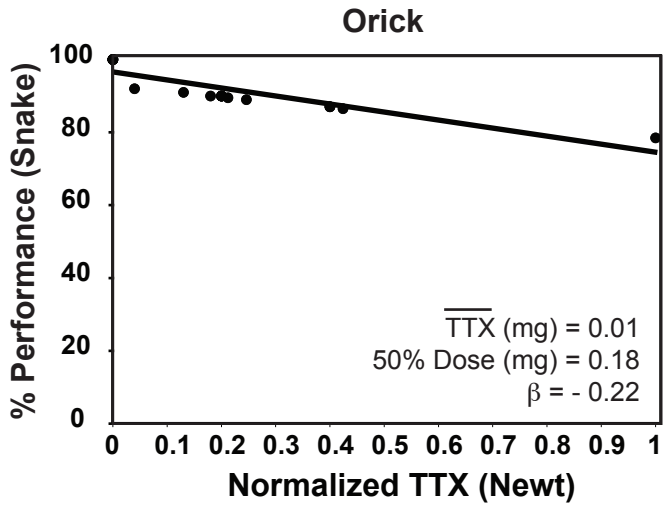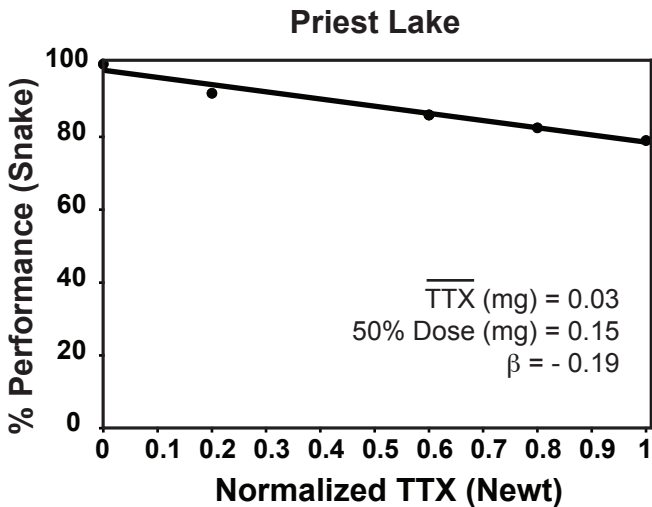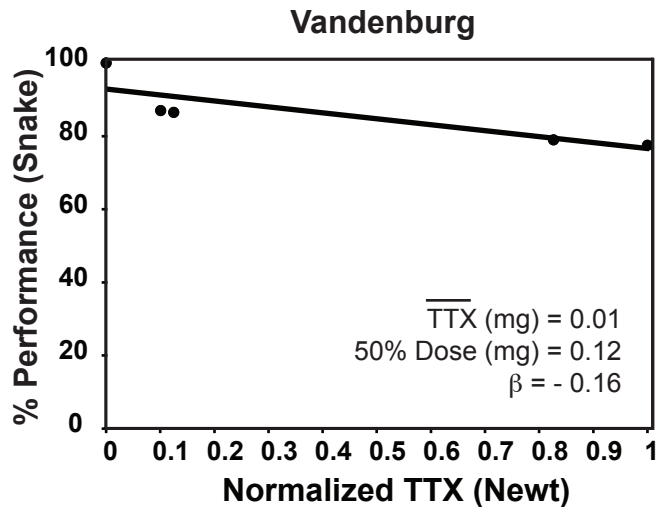

Supplement: S1 (10.1371/journal.pbio.0060060.s001) [file journal.pbio.0060060.s001]
